# Supplementary material for: All-Male Groups in Asian Elephants: A Novel, Adaptive Social Strategy in Increasingly Anthropogenic Landscapes of Southern India
Source: PubMed Central journal article supplement (PMC6609637; doi:10.1038/s41598-019-45130-1), 2019-07-04
Supplement: 41598_2019_45130_MOESM1_ESM.pdf [file 41598_2019_45130_MOESM1_ESM.pdf]

## Supplementary Information

All-Male Groups in Asian Elephants: A Novel, Adaptive Social Strategy in Increasingly Anthropogenic Landscapes of Southern India

**Authors:** Nishant Srinivasaiah<sup>1,\*</sup>, Vinod Kumar<sup>2</sup>, Srinivas Vaidyanathan<sup>2</sup>, Raman Sukumar<sup>3</sup>, Anindya Sinha<sup>1,4</sup>

### Authors' Institutional Affiliations

<sup>1</sup>National Institute of Advanced Studies, Animal Behaviour and Cognition Programme, Bengaluru, 560012, India

<sup>2</sup>Foundation for Ecological Research, Advocacy and Learning, Pondicherry, 605101, India

<sup>3</sup>Indian Institute of Science, Centre for Ecological Sciences, Bengaluru, 560012, India

<sup>4</sup>Indian Institute of Science Education and Research Kolkata, Mohanpur, 741246, India

### \*Corresponding author:

Nishant Srinivasaiah

Mobile: +91 9741037793

Email: msnishant@gmail.com

All-Male Groups in Asian Elephants: A Novel, Adaptive Social Strategy in Increasingly Anthropogenic Landscapes of Southern India

**FIGURE LEGENDS**

**Supplementary Figure 1**

Classification tree showing the relative importance of the different biological and environmental attributes, with statistically significant branches at Nodes, in determining the propensity of male elephants to occur in mixed sex groups. SIM: Sexually Immature, SM: Sexually Mature but Socially Immature, SSM: Sexually and Socially Mature, A: Musth absent, P: Musth present, Y: Associating in mixed-sex groups, N: Not associating in mixed-sex groups.

**Supplementary Figure 2**

Classification tree showing the relative importance of the different biological and environmental attributes, with statistically significant branches at Nodes, in determining the propensity of male elephants to be solitary. SIM: Sexually Immature, SM: Sexually Mature but Socially Immature, SSM: Sexually and Socially Mature, Y: Solitary, N: Not solitary.

**Supplementary Figure 3**

Classification tree showing the relative importance of the different biological and environmental attributes, with statistically significant branches at Nodes, in determining the Body Condition score, on a scale of I to V, of SIM males in all-male groups. SIM: Sexually Immature, SM: Sexually Mature but Socially Immature, SSM: Sexually and Socially Mature.

#### **Supplementary Figure 4**

Classification tree showing the relative importance of the different biological and environmental attributes, with statistically significant branches at Nodes, in determining the Body Condition score, on a scale of I to V, of SSM males in all-male groups. SSM: Sexually and Socially Mature.

#### **Supplementary Figure 5**

Night-image of a tuskless SSM male in *musth*. Note the *musth* secretion from the temporal gland.

#### **Supplementary Figure 6**

Night-image of a tuskless SSM male in *musth*, with the left hind leg in full view with urine dribble stain.

#### **Supplementary Figure 7**

A full-frame day-image of an SSM male in *musth* (see the profuse temporal flow of *musth* secretion) used for individual identification as well.

#### **Supplementary Figure 8**

Lateral profile image of an SSM male in the study area used for identification (shape of tusks and nicks, and cuts in the right ear) and BCI scoring

#### **Supplementary Figure 9**

Frontal profile image of an SSM male, same individual as in the above photograph, in *musth* with urine dribble stain on the hind legs.

### **Supplementary Figure 10**

Typical camera-trap images, in this case of VKT, a SSM male, that were used for individual identification. Note that the shape of the tusks, degree of ear folds, presence of ear nicks, and appearance of the well-formed domes were some of the characteristic features that facilitated the recognition of our individual study elephants.

### **Supplementary Video 1**

All-male group of three male elephants including a tuskless male moving towards a waterhole in the medium-contiguity region of the study landscape

## TABLES AND TABLE LEGENDS

### Supplementary Table 1

Percentage occurrence of the different maturity classes in the social group types

| Maturity Class                             | Percentage in<br>All-Male Group | Percentage in<br>Mixed-Sex Group | Percentage as<br>Solitary |
|--------------------------------------------|---------------------------------|----------------------------------|---------------------------|
| Sexually Immature (SIM)                    | 5.45                            | 80.64                            | 13.91                     |
| Sexually Mature but Socially Immature (SM) | 34.42                           | 28.08                            | 37.50                     |
| Sexually and Socially Mature (SSM)         | 21.28                           | 16.67                            | 62.06                     |

### Supplementary Table 2

Demographic composition of elephant social group types in the study area

| Social Group Type | Percentage of<br>SIM | Percentage of<br>SM | Percentage of<br>SSM |
|-------------------|----------------------|---------------------|----------------------|
| All-male Group    | 9.63                 | 70.43               | 19.93                |
| Mixed-Sex Group   | 66.10                | 26.66               | 7.24                 |
| Solitary          | 15.42                | 48.13               | 36.46                |

### Supplementary Table 3

Distribution of Body Condition scores of male elephants in social group types

| Social Group Type | Percentage<br>Score II | Percentage<br>Score III | Percentage<br>Score IV | Percentage<br>Score V |
|-------------------|------------------------|-------------------------|------------------------|-----------------------|
| All-male Group    | 0                      | 0                       | 48.16                  | 58.14                 |
| Mixed-Sex Group   | 0.15                   | 0.92                    | 71.96                  | 26.96                 |
| Solitary          | 0.21                   | 0.42                    | 45                     | 53.38                 |

# FIGURES

## Supplementary Figure 1

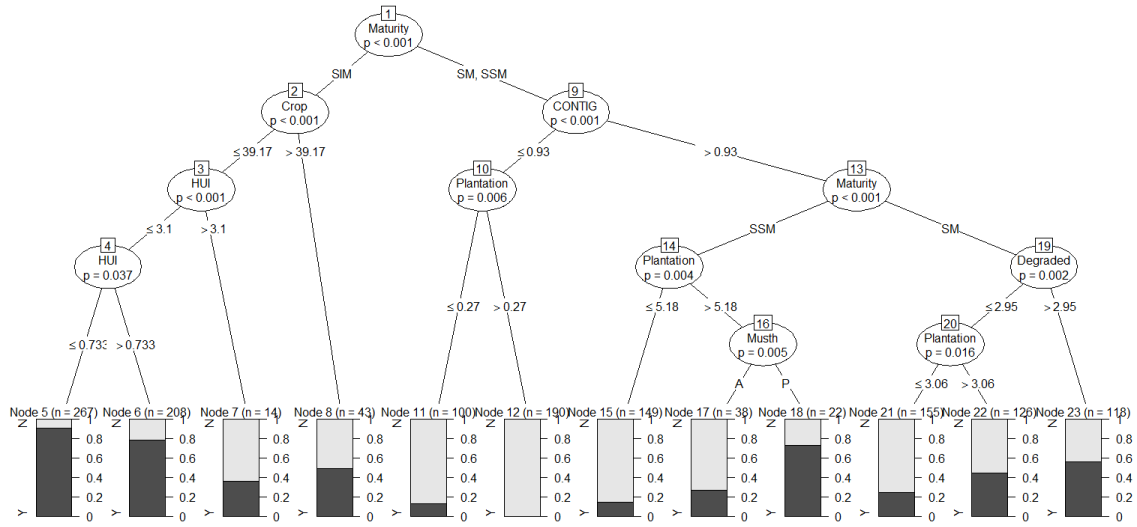

Supplementary Figure 2

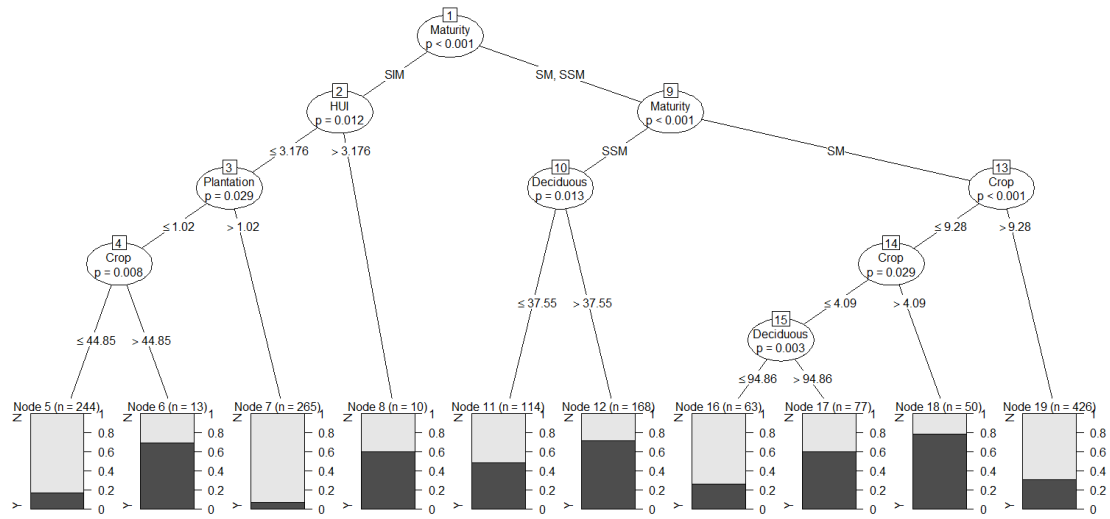



**Supplementary Figure 3**

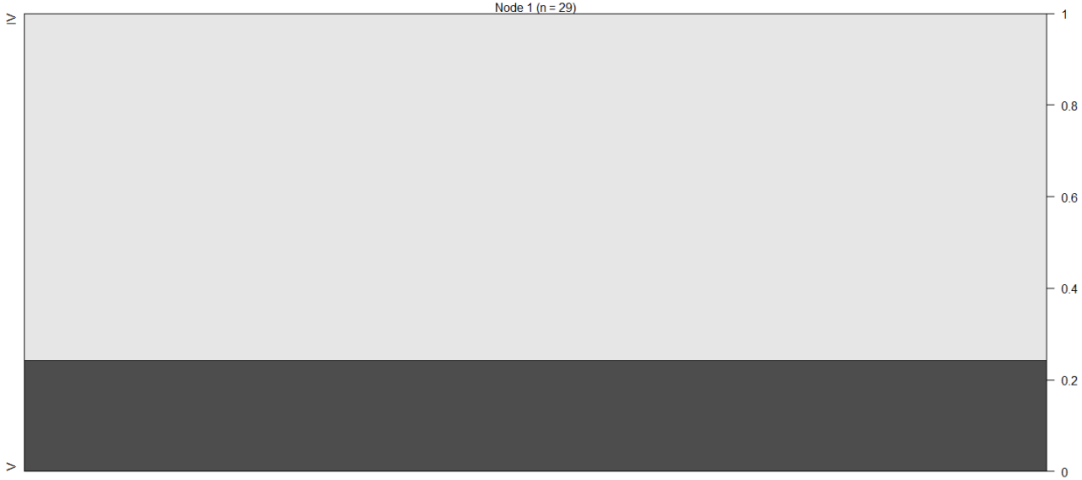

**Supplementary Figure 4**

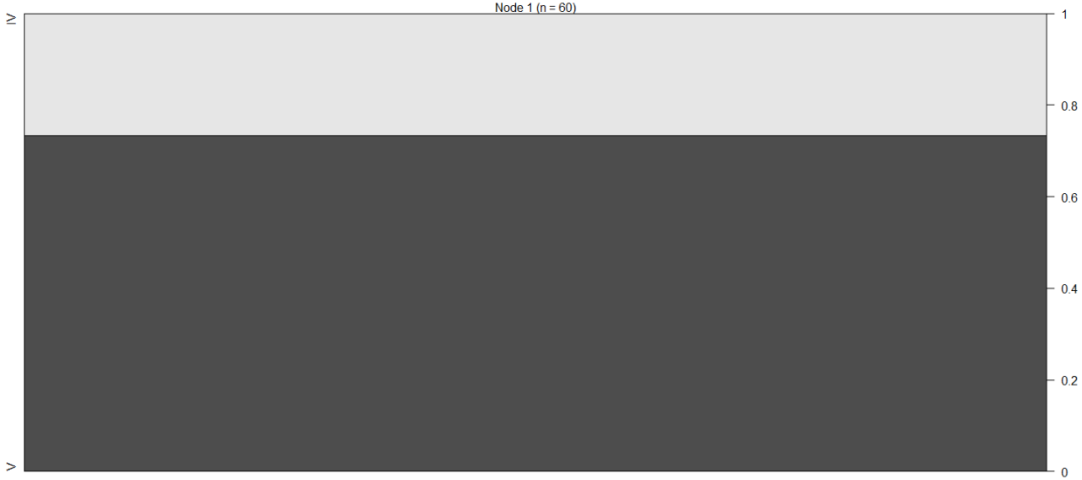

Supplementary Figure 5

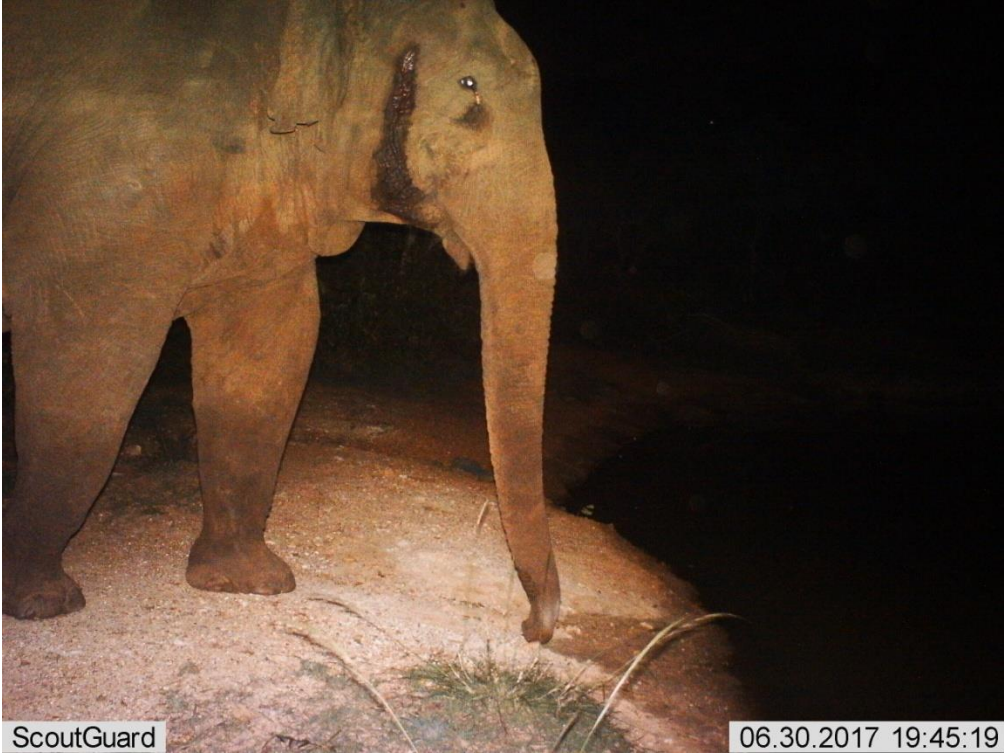

Supplementary Figure 6

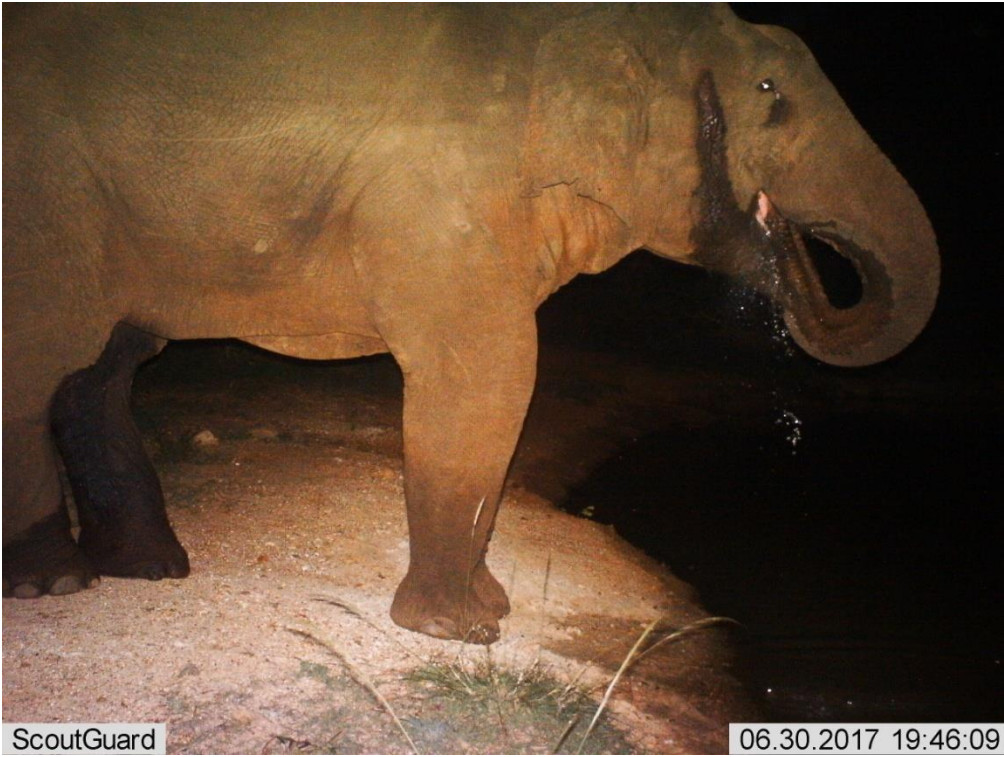

Supplementary Figure 7

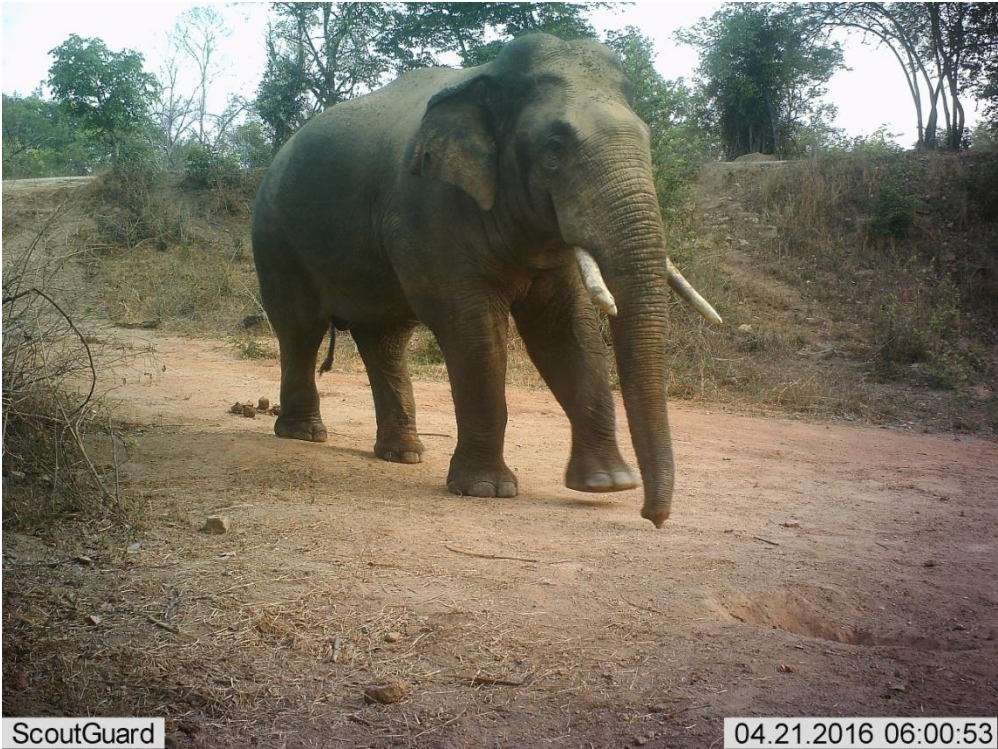



Supplementary Figure 8

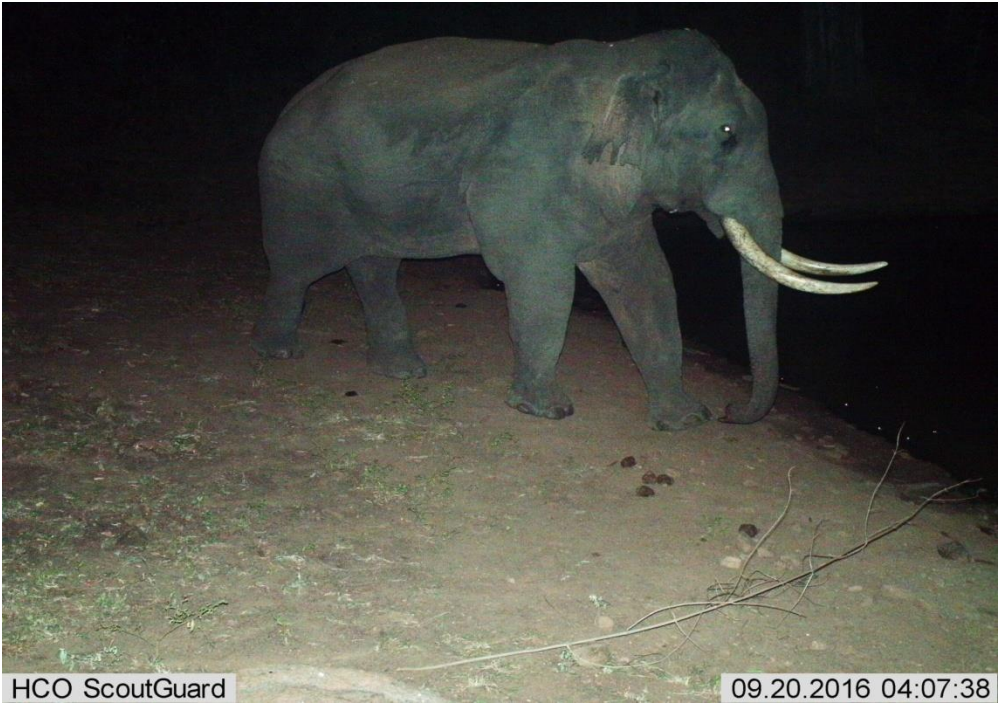

Supplementary Figure 9

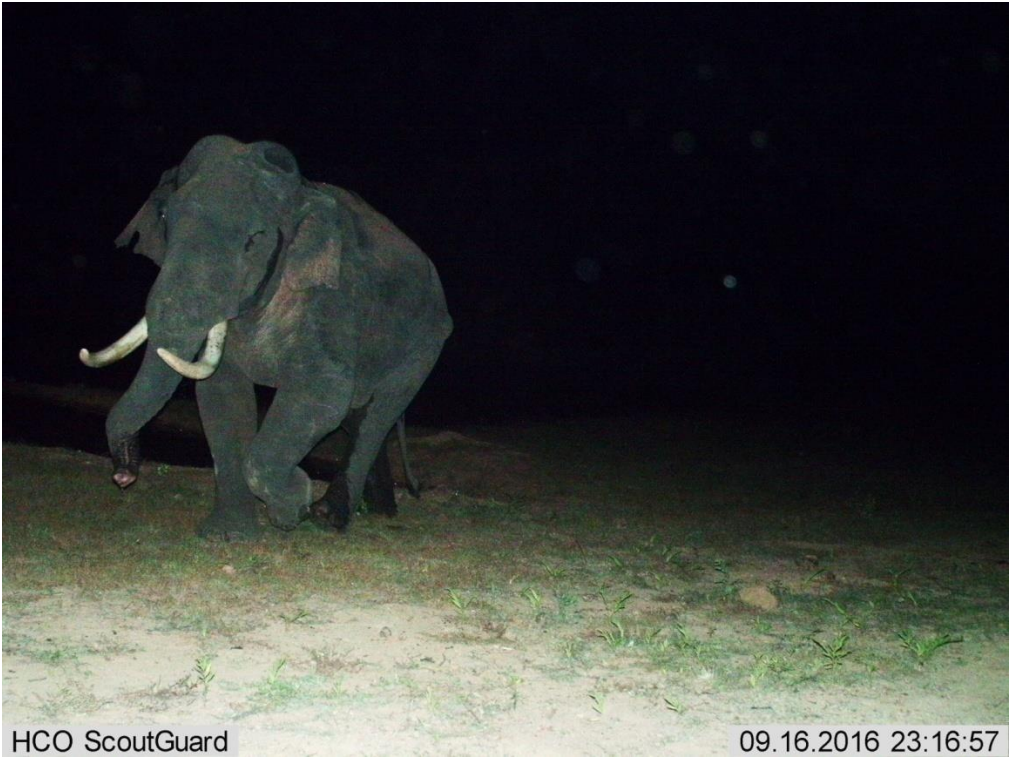

Supplementary Figure 10

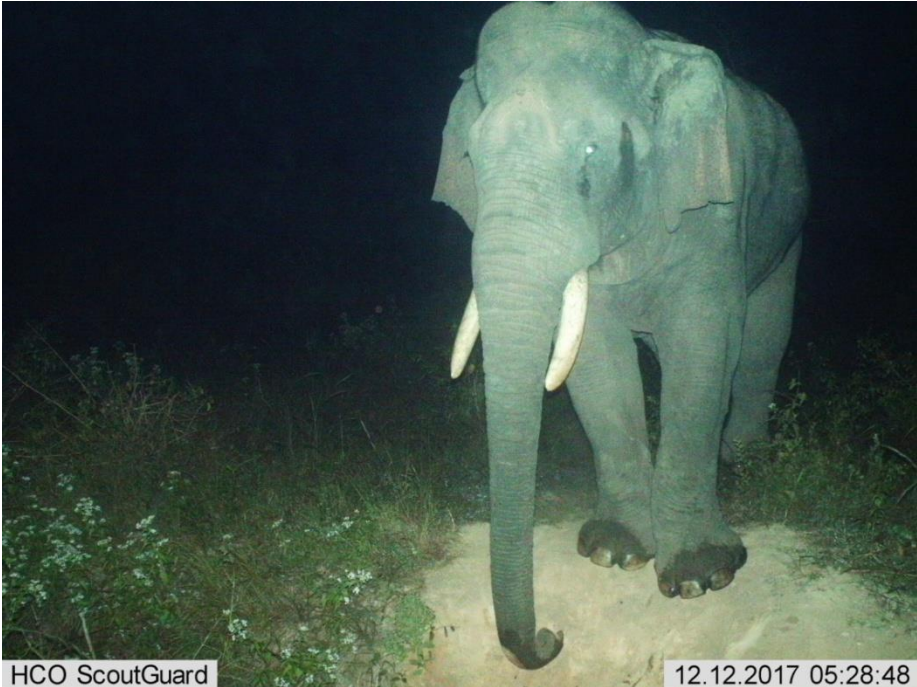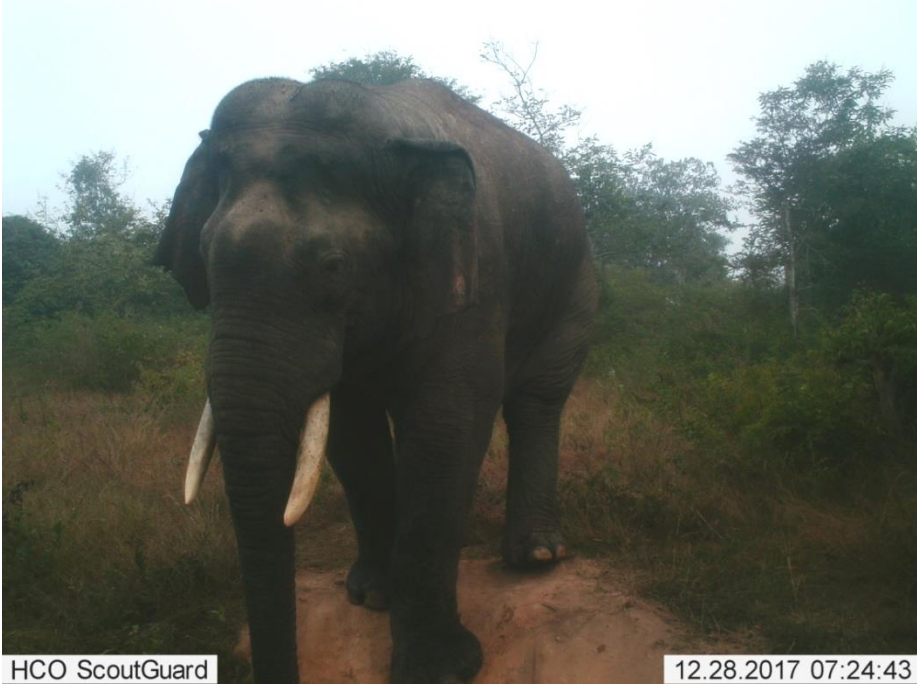



## Supplementary Video 1
